# Supplementary material for: In vivo regulatory phosphorylation of the phosphoenolpyruvate carboxylase AtPPC1 in phosphate-starved Arabidopsis thaliana
Source: PubMed Central journal article supplement — Biochem J. 2009 Apr 28;420(Pt 1):57–65. doi: 10.1042/BJ20082397 (PMC2677216; doi:10.1042/bj20082397), 2009-04-28
Supplement: bj4200057add.pdf [file bj4200057add.pdf]

SUPPLEMENTARY ONLINE DATA

**In vivo regulatory phosphorylation of the phosphoenolpyruvate carboxylase AtPPC1 in phosphate-starved *Arabidopsis thaliana***

Allison L. GREGORY<sup>\*1</sup>, Brenden A. HURLEY<sup>†</sup>, Hue T. TRAN<sup>†</sup>, Alexander J. VALENTINE<sup>‡2</sup>, Yi-Min SHE<sup>§</sup>, Vicki L. KNOWLES<sup>†</sup> and William C. PLAXTON<sup>\*†3</sup>

<sup>\*</sup>Department of Biochemistry, Queen's University, Kingston, ON, Canada, K7L 3N6, <sup>†</sup>Department of Biology, Queen's University, Kingston, ON, Canada, K7L 3N6, <sup>‡</sup>Plant Metabolomics Group, Department of Biotechnology, Faculty of Science, University of the Western Cape, Bellville 7535, South Africa, and <sup>§</sup>Department of Chemistry, Queen's University, Kingston, ON, Canada, K7L 3N6

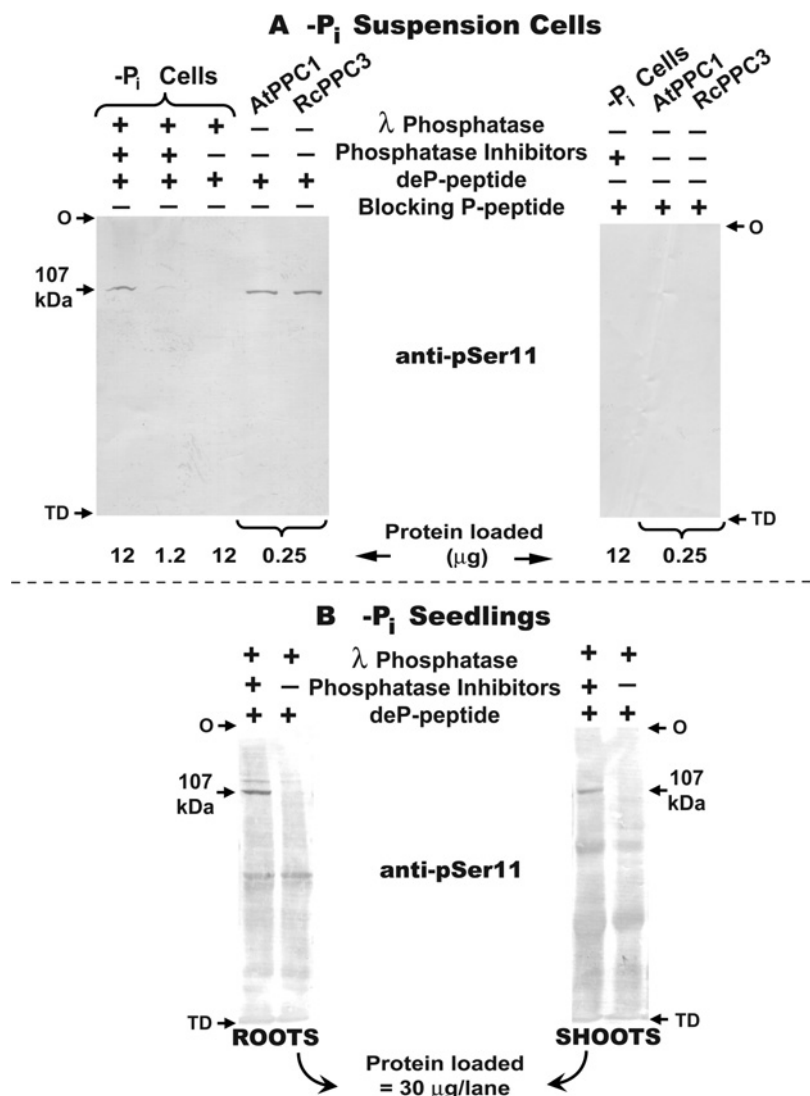

**Figure S1 Anti-pSer-11 antibody specificity**

Clarified extracts from 7-day-old -P<sub>i</sub> suspension cells (A) or roots and shoots of 21-day-old -P<sub>i</sub> seedlings (B) were incubated for 1 h with λ-phosphatase with or without protein phosphatase inhibitors as described in the Experimental section in the main article, subjected to SDS/PAGE and electroblotted on to a PVDF membrane. Immunoblots were probed with anti-pSer-11 IgG in the presence of 10 μg · ml<sup>-1</sup> of the corresponding dephosphopeptide or blocking phosphopeptide (P-peptide) [28] as indicated. AtPPC1 and RcPPC3 denote homogeneous native Class 1 PEPC preparations isolated from the -P<sub>i</sub> *Arabidopsis* suspension cells (see Table 1 and Figure 2 in the main article) or the endosperm of developing castor-oil seeds respectively [26]. deP-peptide, dephosphopeptide; O, origin; P-peptide, phosphopeptide; TD, tracking-dye front.

<sup>1</sup> Present address: Department of Immunology, University of Toronto, Toronto, ON, Canada, M5S 1A8.

<sup>2</sup> Present address: Plant Biology Division, Samuel Roberts Noble Foundation, 2510 Sam Noble Parkway, Ardmore, OK 73401, U.S.A.

<sup>3</sup> To whom correspondence should be addressed (email plaxton@queensu.ca).

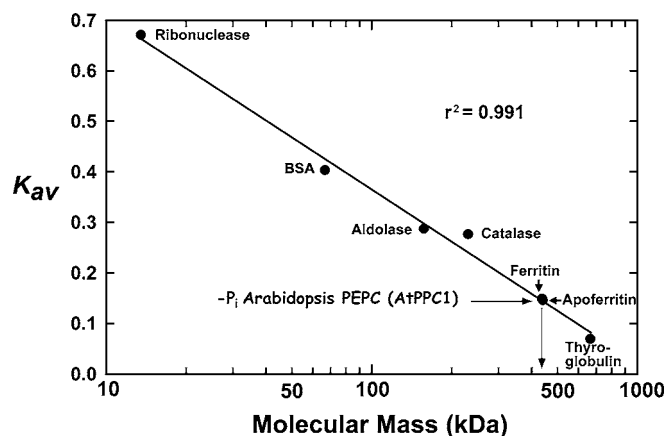

**Figure S2** Native molecular-mass estimation for PEPC from  $-P_i$  *Arabidopsis* suspension cells

Native molecular-mass estimation was performed during FPLC on a calibrated Superdex-200 HR 16/60 gel-filtration column as described in the Experimental section in the main article.  $r^2$ , correlation coefficient.

**Table S1** MALDI-QqTOF-MS identified tryptic peptides (derived from purified native PEPC from  $-P_i$  *Arabidopsis* suspension cells) matching the deduced amino-acid sequence of AtPPC1

MS/MS-sequenced peptides are in bold font, with those unique to AtPPC1 italicized. Calc., calculated; meas., measured.

| Position | <i>m/z</i> (Meas.) | [MH <sup>+</sup> ] (Calc.) | Delta  | Peptide sequence               |
|----------|--------------------|----------------------------|--------|--------------------------------|
| 734-739  | <b>860.431</b>     | <b>860.430</b>             | +0.001 | <b>FVEYFR</b>                  |
| 726-733  | 961.506            | 961.510                    | -0.004 | SVVFQEPR                       |
| 494-503  | <b>1129.628</b>    | <b>1129.636</b>            | -0.008 | <b>RPLFGSDLPK</b>              |
| 153-162  | 1148.587           | 1148.583                   | +0.004 | LATPELEYGR                     |
| 564-576  | 1267.686           | 1267.700                   | -0.014 | LADLEAAPAAVAR                  |
| 553-563  | <b>1325.785</b>    | <b>1325.794</b>            | -0.009 | <b>QLLRVVPLFEK</b>             |
| 189-199  | 1350.698           | 1350.719                   | -0.021 | IRDCLAQLYAK                    |
| 482-493  | <b>1445.761</b>    | <b>1445.774</b>            | -0.013 | <b>RQEWLLSELGSK</b>            |
| 603-615  | <b>1478.766</b>    | <b>1478.775</b>            | -0.009 | <b>DAGRLSAAWQLYK</b>           |
| 770-781  | <b>1489.783</b>    | <b>1489.795</b>            | -0.012 | <b>AIPWIFAWTQTR</b>            |
| 782-795  | <b>1599.872</b>    | <b>1599.879</b>            | -0.007 | <b>FHLPVWLGFCSAIR</b>          |
| 711-725  | <b>1709.835</b>    | <b>1709.841</b>            | -0.006 | <b>ALLDEMAVVATEEYR</b>         |
| 726-739  | <b>1802.916</b>    | <b>1802.922</b>            | -0.006 | <b>SVVFQEPRFVEYFR</b>          |
| 360-375  | <b>1815.970</b>    | <b>1815.996</b>            | -0.026 | <b>SIPTTEPYRVILGDVR</b>        |
| 690-706  | <b>1852.956</b>    | <b>1852.960</b>            | -0.004 | <b>FTAATLEHGMRPPISPCK</b>      |
| 163-179  | 1878.976           | 1878.976                   | 0.000  | NQTVDLVLTAAHTQSVR              |
| 908-923  | <b>1919.028</b>    | <b>1919.061</b>            | -0.033 | <b>IRDPSYHVTLRPHISK</b>        |
| 734-749  | <b>1989.989</b>    | <b>1990.006</b>            | -0.017 | <b>FVEYFRLATPELEYGR</b>        |
| 163-180  | <b>2035.091</b>    | <b>2035.104</b>            | -0.013 | <b>NQTVDLVLTAAHTQSVRR</b>      |
| 360-377  | <b>2059.102</b>    | <b>2059.118</b>            | -0.016 | <b>SIPTTEPYRVILGDVRDK</b>      |
| 889-906  | <b>2159.085</b>    | <b>2159.116</b>            | -0.031 | <b>LRDSYITLLNVCQAYTLK</b>      |
| 644-665  | <b>2201.132</b>    | <b>2201.167</b>            | -0.035 | <b>GGGPTHLLAILSQPPDTINGSLR</b> |
| 476-493  | <b>2262.100</b>    | <b>2262.114</b>            | -0.014 | <b>EWSEERRQEWLLSELGSK</b>      |
| 97-116   | 2290.134           | 2290.164                   | -0.030 | AFSHMLNLANLAEEVQIAYR           |
| 97-116   | 2306.159           | 2306.159                   | 0.000  | AFSHMLNLANLAEEVQIAYR           |
| 666-685  | <b>2364.100</b>    | <b>2364.128</b>            | -0.028 | <b>VTVQGEVIEQSFGEELCFR</b>     |
| 690-710  | 2421.215           | 2421.249                   | -0.034 | FTAATLEHGMRPPISPCKPEWR         |
| 97-117   | 2446.239           | 2446.266                   | -0.027 | AFSHMLNLANLAEEVQIAYRR          |
| 97-117   | 2462.225           | 2462.260                   | -0.035 | AFSHMLNLANLAEEVQIAYRR          |
| 207-227  | <b>2503.256</b>    | <b>2503.278</b>            | -0.022 | <b>QELDEALQREIQAAFRTDEIK</b>   |
| 272-294  | 2577.202           | 2577.230                   | -0.028 | VPYNAPLIQFSSWMGGDRDGNPR        |
| 229-250  | 2622.243           | 2622.211                   | +0.032 | TPPTPQDEMRRAGMSYFHETIWK        |
| 711-733  | 2652.307           | 2652.333                   | -0.026 | ALLDEMAVVATEEYRSVVFQEPR        |
| 934-957  | 2690.323           | 2690.384                   | -0.061 | ELIELNPTSEYAPGLEDTLILTMK       |
| 228-250  | <b>2778.299</b>    | <b>2778.312</b>            | -0.013 | <b>RTPTPQDEMRRAGMSYFHETIWK</b> |
| 30-54    | 2984.489           | 2984.572                   | -0.083 | LVEYDALLLDRFLDILQDLHGEDLR      |
| 302-330  | 3626.669           | 3626.562                   | +0.107 | DVCLLARMMAATMYFNQIEDLMFEMSMWR  |

**Table S2 MALDI QqTOF MS identified Asp-N peptides (derived from purified native PEPC from – P<sub>i</sub> *Arabidopsis* suspension cells) matching AtPPC1**

MS/MS-sequenced peptides are in bold font, with those unique to AtPPC1 italicized. Calc., calculated; meas., measured.

| Position | <i>m/z</i> (Meas.) | [MH <sup>+</sup> ] (Calc.) | Delta         | Peptide sequence              |
|----------|--------------------|----------------------------|---------------|-------------------------------|
| 333–339  | 830.466            | 830.447                    | –0.019        | DEL RARA                      |
| 500–508  | 1015.546           | 1015.530                   | +0.016        | DLPKTEEIA                     |
| 340–348  | 1055.581           | 1055.522                   | +0.059        | DEVHANSRK                     |
| 470–478  | <b>1112.521</b>    | <b>1112.500</b>            | <b>+0.021</b> | <b>DIGSYREWS</b>              |
| 801–809  | <b>1125.601</b>    | <b>1125.583</b>            | <b>+0.018</b> | <b>DVRNLHMLQ</b>              |
| 149–158  | 1191.621           | 1191.589                   | +0.032        | DLNKSPEEIF                    |
| 512–522  | 1212.642           | 1212.625                   | +0.017        | DTFHVIAELPA                   |
| 52–61    | <b>1265.660</b>    | <b>1265.637</b>            | <b>+0.023</b> | <b>DIRETVQELY</b>             |
| 138–148  | 1278.706           | 1278.694                   | +0.012        | DLEETFKKLVG                   |
| 224–234  | <b>1281.690</b>    | <b>1281.679</b>            | <b>+0.011</b> | <b>DEIKRTPPTQ</b>             |
| 2–12     | 1302.738           | 1302.719                   | +0.019        | ANR KLEMASI                   |
| 290–301  | 1340.709           | 1340.691                   | +0.018        | DGNPRVTPVTR                   |
| 880–890  | 1457.884           | 1457.869                   | +0.015        | DPYLKQRLRLR                   |
| 566–580  | <b>1529.851</b>    | <b>1529.832</b>            | <b>+0.019</b> | <b>DLEAAPAAVARLFSV</b>        |
| 13–26    | <b>1576.893</b>    | <b>1576.880</b>            | <b>+0.013</b> | <b>DVHLRQLVPGKVSE</b>         |
| 210–223  | <b>1647.857</b>    | <b>1647.844</b>            | <b>+0.013</b> | <b>DEALKREIQAAFRT</b>         |
| 13–27    | 1691.888           | 1691.907                   | –0.019        | DVHLRQLVPGKVSSED              |
| 810–822  | 1739.861           | 1739.836                   | +0.025        | DMYQHWPFRRVTI                 |
| 434–449  | <b>1851.064</b>    | <b>1851.048</b>            | <b>+0.016</b> | <b>DFLRQVSTFGLSLVR</b>        |
| 696–713  | <b>2114.132</b>    | <b>2114.132</b>            | <b>0.000</b>  | <b>EHGMRPPISPKEWRAIL</b>      |
| 581–598  | <b>2201.089</b>    | <b>2201.080</b>            | <b>+0.009</b> | <b>DWYKNRINGKQEVMI GYS</b>    |
| 376–394  | 2262.162           | 2262.148                   | +0.014        | DKLYHTRERAHQLLSNGHS           |
| 891–909  | <b>2315.232</b>    | <b>2315.217</b>            | <b>+0.015</b> | <b>DSYITTLNVCQAYTLKRIR</b>    |
| 138–158  | 2451.258           | 2451.265                   | –0.007        | DLEETFKKLVGD LNKSPEEIF        |
| 479–499  | <b>2517.331</b>    | <b>2517.320</b>            | <b>+0.011</b> | <b>EERRQEWLLSELGKRPLFGS</b>   |
| 167–190  | 2781.612           | 2781.607                   | +0.005        | DLVLT AHTQSVRRSLLQKHGRIR      |
| 349–372  | 2836.469           | 2836.283                   | +0.186        | DAAKHYIEFWKSIP TTEPYRVILG     |
| 235–259  | 3054.611           | 3054.581                   | +0.030        | DEM RAGMSYFHETIWKGV PKFLRRV   |
| 260–287  | 3106.553           | 3106.566                   | –0.013        | DTALKNIGIEERV PYNAPLIQFSSWMGG |
| 470–499  | 3610.807           | 3610.803                   | +0.004        | DIGSYREWSEERRQEWLLSELGKRPLFGS |

Received 19 December 2008/10 February 2009; accepted 19 February 2009

Published as BJ Immediate Publication 19 February 2009, doi:10.1042/BJ20082397
